# Supplementary material
Source: Springer Nature journal article supplement (https://www.springermedizin.de/resource/supplementary/12882_2010_172_MOESM1_ESM.pdf/9453198)
Supplement: MOESM1 [file 9453198]

**Canadian Organ  
Replacement Register**  
Incident Pediatric ESRD Patients  
1992 - 2007

**Postal Code  
Conversion File**  
Statistics Canada  
2006

**Linkage**

**Canadian Institute for  
Health Information  
Discharge Abstract  
Database**

Hospitalization Records  
1994 - 2007

**Canadian Pediatric  
End-Stage Renal Disease  
Database**

**Unique Identifier**  
**Socio-demographics**  
Date of birth  
Gender  
Ethnicity  
Residence location  
Socioeconomic status  
**Clinical Variables**  
Index RRT date  
Modality of RRT  
Change in modality & date  
Renal transplant details  
Selected comorbidity  
Treatment facilities  
Change in treatment facilities  
**Health Services Use**  
Hospitalizations  
Special care unit stay  
Dates of admission/discharge  
**Outcomes**  
Death and death date  
Renal Allograft Loss and date  
ICD 9/10 Diagnostic codes  
ICD 9/10 Procedure codes  
Lost to follow-up  
Withdrawn from treatment
